# Supplementary material for: Characterization of the Glucan-Branching Enzyme GlgB Gene from Swine Intestinal Bacteria
Source: MDPI journal article supplement (doi:10.3390/molecules28041881), 2023-02-16
Supplement: s1 [file s1]

**Online supplementary material to**  
**Characterization of the glucan-branching enzyme *glgB* gene from swine intestinal bacteria**  
**and its potential role in forming low-digestible oligosaccharides**

Yuqi Shao, Weilan Wang, Ying Hu, Michael G. Gänzle

**Supplementary Figure S1.** HPAEC-PAD profiles of oligosaccharides after hydrolysis of starch from pea

**Supplementary Table S1.** Concentration of iodine-binding amylose in raw starches before and after the treatment with GlgB.

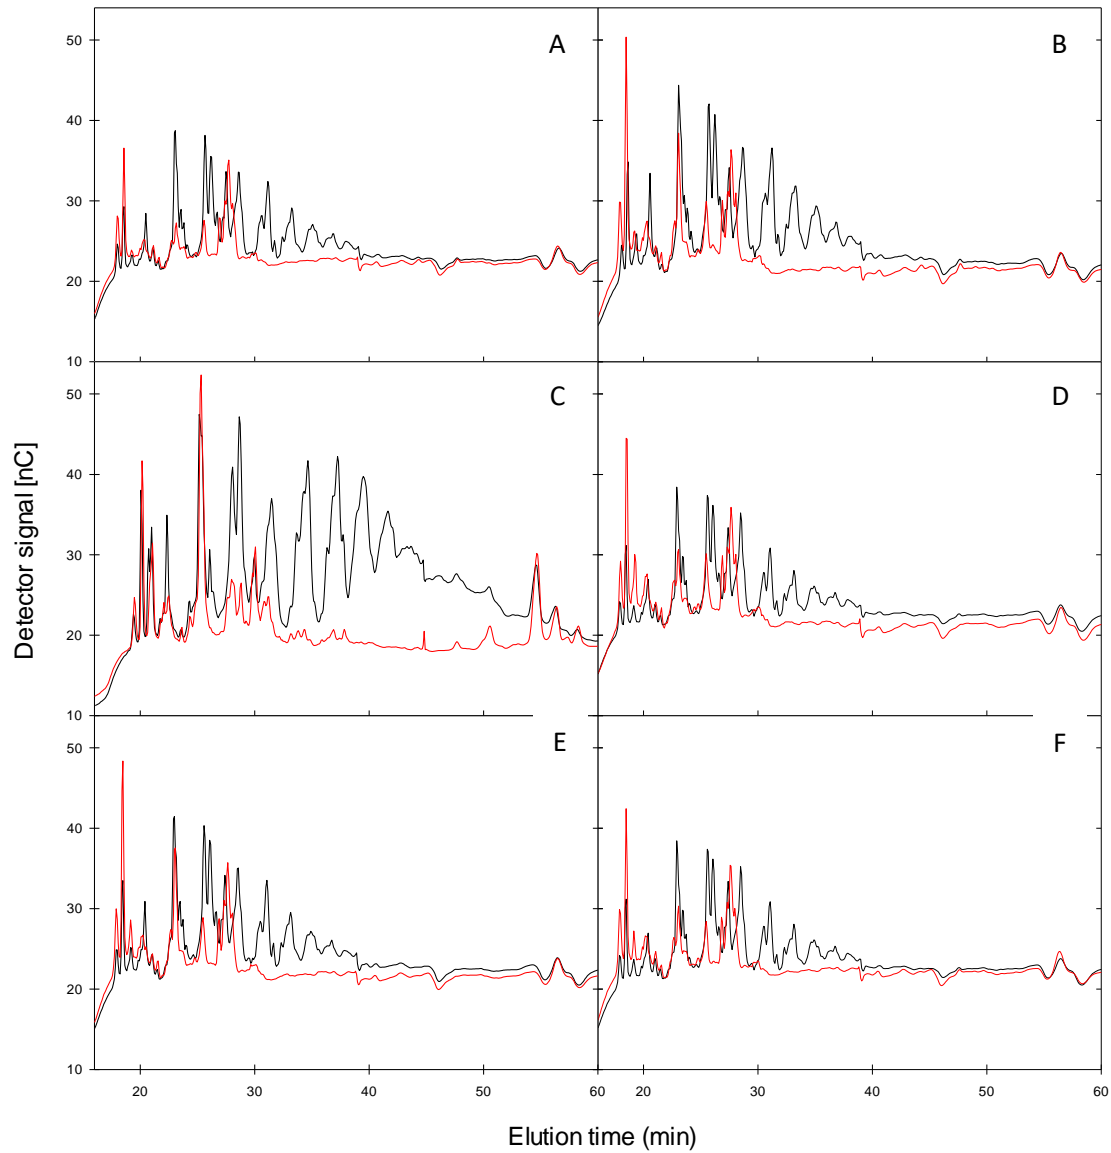

**Supplementary Figure S1.** HPAEC-PAD profiles of oligosaccharides after hydrolysis of starch from pea (**Panel A**), fava bean ((**Panel B**), potato (**Panel C**), corn (**Panel D**), wheat (**Panel E**) and barley (**Panel E**) by  $\alpha$ - and  $\beta$ -amylases. Starches were treated with GlgB (black line); untreated starches served as control (red line). Monosaccharides eluting between 3 and 10 min are not shown.

**Supplementary Table S1.** Concentration of iodine-binding amylose in raw starches before and after the treatment with GlgB. Data are shown as average  $\pm$  standard deviation of three replicate experiments. Values for GlgB treated starches are marked with an asterisk if treatment significantly ( $P<0.05$ ) reduced the amylose content.

|                  | Amylose content (g/l) |                  |
|------------------|-----------------------|------------------|
|                  | Control               | GlgB Treatment   |
| <b>Raw corn</b>  | 0.31 $\pm$ 0.07       | 0.24 $\pm$ 0.01  |
| <b>Raw pea</b>   | 0.19 $\pm$ 0.02       | 0.14 $\pm$ 0.02* |
| <b>Raw wheat</b> | 0.24 $\pm$ 0.04       | 0.22 $\pm$ 0.01  |
