# Supplementary material for: Characterization of the Glucan-Branching Enzyme GlgB Gene from Swine Intestinal Bacteria
Source: Molecules. 2023 Feb 16;28(4):1881. doi: 10.3390/molecules28041881 (PMC9960391; doi:10.3390/molecules28041881)
Supplement: Supplementary file 1 [file molecules-28-01881-s001.zip › Table S2 Organization of GlgB containing operons in 50 MAG.xlsx]

## Sheet: Sheet1
glgb_contig	Bin_ID_Taxa	Operon_#	Operon_type				Operon_type
maxbinout_W2P44.032._Contig485_5	Bin135 Clostridium							[G] 1,4-alpha-glucan branching enzyme
maxbinout_W0P9.022._Contig57_84	Bin136 Clostridium bolteae	2						[G] 1,4-alpha-glucan branching enzyme; [G] ADP-glucose pyrophosphorylase; [G] Glycogen synthase
maxbinout_W0P25.026._Contig3477_7	Bin137 Clostridium bolteae	2						[G] Phosphotransferase system, HPr-related proteins; [G] Phosphomannomutase;[G] 1,4-alpha-glucan branching enzyme; [G] Glucan phosphorylase; [G] Type II secretory pathway, pullulanase PulA
maxbinout_W0P25.025._Contig12640_1	Bin138 Clostridium scindens	1						[G] 1,4-alpha-glucan branching enzyme; [S] Predicted membrane protein
maxbinout_W0P45.018._Contig107_3	Bin139 Eubacteriaceae saphenum	1						[G] Methylglyoxal synthase; [G] 1,4-alpha-glucan branching enzyme
maxbinout_W0P9.033._Contig1419_4	Bin141 Eubacterium saphenum	1						[G] 1,4-alpha-glucan branching enzyme; [G] ADP-glucose pyrophosphorylase/ [G] Glycogen synthase; [G] Glycosidases/[G] 4-alpha-glucanotransferase
maxbinout_W3P21.043._Contig649_4	Bin146 Eubacterium rectale	1
maxbinout_W0P33.039._Contig859_2	Bin147 Lachnospiraceae	1
maxbinout_W2P44.007._Contig19_56	Bin148 Oribacterium
maxbinout_W0P25.020._Contig616_25	Bin149 Lachnospiraceae	2
maxbinout_W0P45.013._Contig628_13	Bin150 Lachnospiraceae	2
maxbinout_W0P5.016._Contig723_2	Bin151 Lachnospiraceae	1
maxbinout_W2P37.038._Contig192_21	Bin152 Lachnospiraceae	1
maxbinout_W3P1.012._Contig3854_2	Bin153 Lachnospiraceae	2
maxbinout_W0P12.025._Contig214_40	Bin155 Ruminococcus	1
maxbinout_W0P13.033._Contig233_48	Bin157 Ruminococcus	1
maxbinout_W0P37.013._Contig41_57	Bin160 Ruminococcus	1
maxbinout_W0P45.002._Contig53_89	Bin163 Ruminococcus	1
maxbinout_W1P25.006._Contig901_30	Bin167 Ruminococcus	1
maxbinout_W1P44.055._Contig2817_10	Bin170 Ruminococcus	1
maxbinout_W0P21.012._Contig710_14	Bin186 Faecalibacterium prausnitzii	2
maxbinout_W1P29.024._Contig607_21	Bin187 Faecalibacterium prausnitzii	2
maxbinout_W3P21.005._Contig244_26	Bin189 Faecalibacterium prausnitzii	2
maxbinout_W3P39.006._Contig101_2	Bin190 Faecalibacterium prausnitzii	3
maxbinout_W1P44.017._Contig1296_9	Bin192 Ruminococcus bromii	1
maxbinout_W0P28.079._Contig2623_2	Bin193 Ruminococcus flavefaciens	2
maxbinout_W0P39.027._Contig853_1	Bin194 Ruminococcus flavefaciens	2
maxbinout_W2P31.028._Contig2632_14	Bin195 Ruminococcus flavefaciens	2
maxbinout_W0P12.010._Contig296_32	Bin196 Ruminococcus flavefaciens	2
maxbinout_W1P20.008._Contig4_262	Bin198 Subdoligranulum variabile	2
maxbinout_W1P45.008._Contig6_244	Bin199 Subdoligranulum variabile	2
maxbinout_W3P21.016._Contig1158_12	Bin201 Subdoligranulum variabile	2
maxbinout_W3P7.014._Contig3042_6	Bin202 Subdoligranulum variabile	1
maxbinout_W0P18.021._Contig1252_9	Bin203 Subdoligranulum variabile	2
maxbinout_W1P13.006._Contig673_10	Bin204 Subdoligranulum variabile	2
maxbinout_W0P45.005._Contig6_8	Bin239 unclassified Clostridiales	1
maxbinout_W1P13.036._Contig6430_3	Bin261 unclassified Clostridiales	1
maxbinout_W1P29.008._Contig6807_3	Bin272 unclassified Clostridiales	2
maxbinout_W1P33.008._Contig38_32	Bin275 unclassified Clostridiales	2
maxbinout_W1P39.021._Contig1532_11	Bin277 unclassified Clostridiales	1
maxbinout_W3P37.003._Contig2611_12	Bin320 unclassified Clostridiales	1
maxbinout_W0P9.011._Contig811_18	Bin324 Erysipelotrichaceae	2
maxbinout_W3P5.015._Contig61_13	Bin325 Erysipelotrichaceae	2
maxbinout_W1P45.002._Contig94_32	Bin332 Megasphaera	1
maxbinout_W3P21.002._Contig61_33	Bin333 Megasphaera	1
maxbinout_W3P31.006._Contig4013_43	Bin334 Megasphaera	1
maxbinout_W3P44.014._Contig137_10	Bin335 Megasphaera	1
maxbinout_W1P45.014._Contig1_58	Bin336 Mitsuokella	1
maxbinout_W2P9.022._Contig134_47	Bin338 Mitsuokella	1
maxbinout_W3P13.009._Contig15_60	Bin339 Mitsuokella multacida	2
